# Supplementary material for: Microwave-assisted organic syntheses: microwave effect on intramolecular reactions – the Claisen rearrangement of allylphenyl ether and 1-allyloxy-4-methoxybenzene
Source: Royal Society of Chemistry journal article supplement (doi:10.1039/c5ra18039b), 2015-01-01
Supplement: c5ra18039b1.pdf [file c5ra18039b1.pdf]

## Supplementary information

### **Microwave-assisted organic syntheses: Microwave effect on intramolecular reactions – the Claisen rearrangement of allylphenyl ether and 1-allyloxy-4-methoxybenzene**

**Satoshi Horikoshi,<sup>1†</sup> Tomoki Watanabe,<sup>1</sup> Momoko Kamata,<sup>1</sup> Yumiko Suzuki,<sup>1</sup> and Nick Serpone<sup>2</sup>**

<sup>1</sup> *Department of Materials and Life Sciences, Faculty of Science and Technology, Sophia University, 7-1 Kioicho, Chiyodaku, Tokyo 102-8554, Japan*

<sup>2</sup> *Visiting Professor, PhotoGreen Laboratory, Dipartimento di Chimica, Universita di Pavia, via Taramelli 12, Pavia 27100, Italy*

Proton NMR spectra taken in CDCl<sub>3</sub> solvent are reported for the precursor substrate 1-allyloxy-4-methoxybenzene (**Figure S1**) and for the product of the Claisen rearrangement 2-allyl-4-methoxyphenol (**Figure S2**).

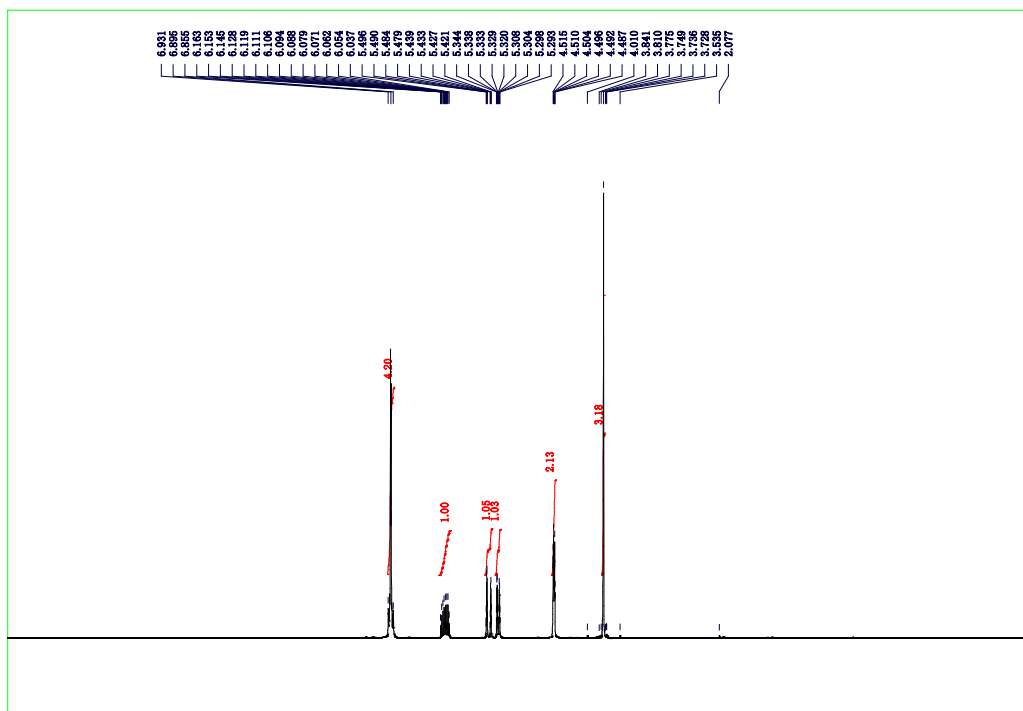

**Figure S-1.** Proton NMR spectrum of 1-allyloxy-4-methoxybenzene in CDCl<sub>3</sub> solvent.

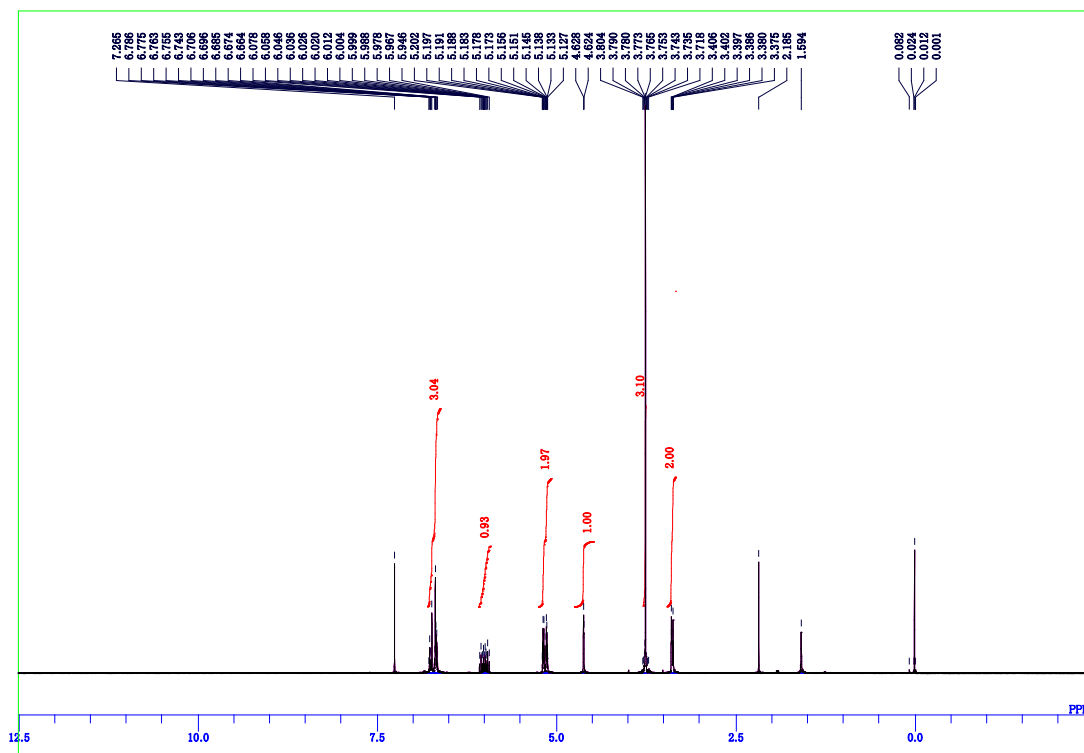

**Figure S-2.** Proton NMR spectrum of 2-allyl-4-methoxyphenol in CDCl<sub>3</sub> solvent.
